# Supplementary material for: Risk of Deficiency in Multiple Concurrent Micronutrients in Children and Adults in the United States
Source: PubMed Central journal article supplement (PMC5537775; doi:10.3390/nu9070655), 2017-06-24
Supplement: nutrients-09-00655-s001.pdf [file nutrients-09-00655-s001.pdf]

**Supplementary table S1: Proportion of population with Usual Intakes below the EAR, RDA and above the TUL for 6 vitamins and iron in the U.S. population > 9 y, from NHANES 2003-2006**

| Vitamin or mineral       | N     | Proportion with inadequate intake according to EAR <sup>4</sup> |     | Proportion with insufficient intake according to RDA <sup>4</sup> |     | Proportion with excessive intake according to TUL <sup>4</sup> |      |
|--------------------------|-------|-----------------------------------------------------------------|-----|-------------------------------------------------------------------|-----|----------------------------------------------------------------|------|
|                          |       | %                                                               | SE  | %                                                                 | SE  | %                                                              | SE   |
| Vitamin A <sup>1</sup>   | 13027 | 51.5                                                            | 1.0 | 72.1                                                              | 0.9 | 0.31                                                           | 0.01 |
| Vitamin B6               | 13027 | 21.2                                                            | 0.9 | 32.0                                                              | 1.0 | 0                                                              | -    |
| Vitamin B12 <sup>2</sup> | 13027 | 12.2                                                            | 0.6 | 18.1                                                              | 0.7 | -                                                              | -    |
| Folate <sup>3</sup>      | 13027 | 21.2                                                            | 0.8 | 35.3                                                              | 0.9 | 0.68                                                           | 0.12 |
| Vitamin C                | 13027 | 48.0                                                            | 1.0 | 56.1                                                              | 1.1 | 0                                                              | -    |
| Vitamin E                | 13027 | 88.9                                                            | 0.5 | 94.4                                                              | 0.4 | 0                                                              | -    |
| Iron                     | 13027 | 7.3                                                             | 0.4 | 29.3                                                              | 0.9 | 1.1                                                            | 0.13 |

EAR, Estimated Average Requirement; NHANES, National Health and Nutrition Examination Survey; RDA, Recommended Dietary Allowance; TUL, Tolerable Upper Limit.

<sup>1</sup>For calculating the proportion meeting the EAR and RDA for vitamin A, total intake is based on Retinol Activity Equivalents (based on intake of pre-formed vitamin A as retinol, and intake of pro-vitamin A carotenoids), while retinol intakes are used to calculate the TUL (from: Otten, J. J., et al., Eds. (2006). Dietary reference intakes: the essential guide to nutrient requirements. Washington, DC., The National Academies Press.)

<sup>2</sup>No TUL is defined for vitamin B12

<sup>3</sup>For calculating the proportion meeting the EAR and RDA for folate, total intake was based on naturally occurring folates in foods and folic acid in fortified foods and dietary supplements, while only folate intakes from fortified foods and dietary supplements is used to calculate the TUL (from: Otten, J. J., et al., Eds. (2006). Dietary reference intakes: the essential guide to nutrient requirements. Washington, DC., The National Academies Press.)

<sup>4</sup>Values are are percentage of U.S. population aged  $\geq 9$  y not meeting the EAR or RDA, or exceeding the TUL, for individual age, gender and lifespan groups.

**Supplementary table S2: Dietary inadequacy/insufficiency score in the U.S. population aged  $\geq 9$  y, based on NHANES 2003-2006**

| Dietary inadequacy/<br>insufficiency score* | Percentage of U.S. population,<br>based on EAR |     |      | Percentage of U.S. population, based<br>on RDA |     |      |
|---------------------------------------------|------------------------------------------------|-----|------|------------------------------------------------|-----|------|
|                                             | N                                              | %   | SE   | N                                              | %   | SE   |
| 0                                           | 667                                            | 6.4 | 0.34 | 228                                            | 2.3 | 0.25 |
| 1                                           | 3123                                           | 24  | 0.74 | 1603                                           | 12  | 0.49 |
| 2                                           | 3518                                           | 27  | 0.61 | 2901                                           | 21  | 0.63 |
| 3                                           | 2463                                           | 19  | 0.49 | 2719                                           | 21  | 0.55 |
| 4                                           | 1506                                           | 11  | 0.62 | 1898                                           | 15  | 0.42 |
| 5                                           | 891                                            | 6.3 | 0.39 | 1648                                           | 12  | 0.57 |
| 6                                           | 576                                            | 4.3 | 0.43 | 1227                                           | 8.9 | 0.49 |
| 7                                           | 283                                            | 1.9 | 0.15 | 803                                            | 6.1 | 0.40 |

EAR, Estimated Average Requirement; NHANES, National Health and Nutrition Examination Survey; RDA, Recommended Dietary Allowance; TUL, Tolerable Upper Limit.

\*The dietary inadequacy/insufficiency score is based on not meeting the EAR or RDA for vitamins A, B6, B12, C, E, folate, or the mineral iron, for cut-off points based on participants' age, gender and pregnancy or breastfeeding status. N reflects crude counts. Percentages are weighted to be representative of the U.S. population.

**Supplementary table S3: Total counts of vitamins and minerals in dietary supplement products used in NHANES 2003-2006**

|                                 |                    | Count of minerals in supplement |      |     |     |     |     |     |           |           |           |           |           |           |           |           |           |            |     | <i>Total count</i> |
|---------------------------------|--------------------|---------------------------------|------|-----|-----|-----|-----|-----|-----------|-----------|-----------|-----------|-----------|-----------|-----------|-----------|-----------|------------|-----|--------------------|
|                                 |                    | 0                               | 1    | 2   | 3   | 4   | 5   | 6   | 7         | 8         | 9         | 10        | 11        | 12        | 13        | 14        | 15        | 16         | 17+ |                    |
| Count of vitamins in supplement | 0                  | 2941                            | 710  | 308 | 80  | 19  | 7   | 3   | 1         | 2         | 3         | 6         | 3         | 5         | 2         | 1         | 0         | 0          | 12  | 4103               |
|                                 | 1                  | 902                             | 379  | 123 | 45  | 9   | 5   | 25  | 3         | 4         | 1         | 2         | 3         | 2         | 0         | 0         | 0         | 0          | 0   | 1503               |
|                                 | 2                  | 184                             | 65   | 58  | 22  | 7   | 8   | 11  | 6         | 2         | 1         | 0         | 2         | 0         | 0         | 0         | 0         | 0          | 0   | 366                |
|                                 | 3                  | 85                              | 73   | 46  | 44  | 23  | 7   | 9   | 3         | 0         | 0         | 0         | 0         | 0         | 0         | 0         | 0         | 0          | 0   | 290                |
|                                 | 4                  | 28                              | 13   | 17  | 17  | 11  | 7   | 2   | 7         | 0         | 0         | 0         | 0         | 0         | 2         | 0         | 0         | 0          | 0   | 104                |
|                                 | 5                  | 19                              | 13   | 10  | 9   | 6   | 10  | 0   | 2         | 4         | 0         | 1         | 0         | 0         | 0         | 0         | 0         | 0          | 0   | 74                 |
|                                 | 6                  | 23                              | 18   | 11  | 9   | 1   | 4   | 2   | 5         | 0         | 0         | 0         | 0         | 0         | 0         | 0         | 0         | 0          | 0   | 73                 |
|                                 | 7                  | 18                              | 9    | 4   | 9   | 10  | 3   | 0   | 2         | 0         | 0         | 0         | 0         | 0         | 0         | 0         | 0         | 0          | 0   | 55                 |
|                                 | 8                  | 65                              | 33   | 19  | 5   | 5   | 17  | 3   | 2         | 0         | 0         | 0         | 0         | 0         | 0         | 0         | 0         | 0          | 0   | 149                |
|                                 | 9                  | 135                             | 35   | 6   | 21  | 12  | 14  | 5   | 4         | 0         | 0         | 1         | 0         | 1         | 0         | 0         | 0         | 0          | 1   | 235                |
|                                 | 10                 | 91                              | 78   | 42  | 75  | 51  | 40  | 7   | 9         | 4         | 2         | 0         | 1         | 2         | 0         | 0         | 0         | 0          | 0   | 402                |
|                                 | 11                 | 55                              | 31   | 7   | 27  | 27  | 5   | 11  | 12        | 18        | 4         | 6         | 1         | 5         | 0         | 0         | 0         | 0          | 0   | 209                |
|                                 | 12                 | 13                              | 15   | 7   | 5   | 9   | 20  | 21  | <b>68</b> | <b>49</b> | <b>23</b> | <b>33</b> | <b>47</b> | <b>11</b> | <b>4</b>  | <b>6</b>  | <b>2</b>  | <b>4</b>   | 1   | 338                |
|                                 | 13                 | 1                               | 7    | 2   | 3   | 1   | 6   | 9   | <b>74</b> | <b>75</b> | <b>89</b> | <b>93</b> | <b>93</b> | <b>33</b> | <b>34</b> | <b>95</b> | <b>67</b> | <b>202</b> | 5   | 889                |
|                                 | 14                 | 3                               | 1    | 0   | 0   | 0   | 0   | 2   | <b>3</b>  | <b>9</b>  | <b>20</b> | <b>40</b> | <b>49</b> | <b>59</b> | <b>26</b> | <b>6</b>  | <b>0</b>  | <b>5</b>   | 3   | 226                |
|                                 | 16                 | 0                               | 0    | 0   | 0   | 0   | 0   | 0   | <b>0</b>  | <b>0</b>  | <b>0</b>  | <b>2</b>  | <b>3</b>  | <b>0</b>  | <b>0</b>  | <b>0</b>  | <b>0</b>  | <b>0</b>   | 0   | 5                  |
|                                 | 17                 | 0                               | 0    | 0   | 0   | 0   | 0   | 0   | <b>0</b>  | <b>0</b>  | <b>0</b>  | <b>1</b>  | <b>0</b>  | <b>0</b>  | <b>0</b>  | <b>0</b>  | <b>0</b>  | <b>0</b>   | 0   | 1                  |
|                                 | 18                 | 0                               | 0    | 0   | 0   | 0   | 0   | 0   | <b>0</b>  | <b>0</b>  | <b>0</b>  | <b>0</b>  | <b>1</b>  | <b>1</b>  | <b>1</b>  | <b>0</b>  | <b>0</b>  | <b>0</b>   | 0   | 3                  |
|                                 | <i>Total count</i> | 4564                            | 1480 | 660 | 371 | 191 | 153 | 110 | 201       | 167       | 146       | 188       | 204       | 131       | 68        | 108       | 69        | 211        | 22  | 9044               |

NHANES, National Health and Nutrition Examination Survey.

**Bold** = Full Spectrum Multivitamin-Multimineral category (FSMV), green text = 50+ products, yellow text = 100-200 products, red text = 200+ products

**Supplementary table S4: Demographic characteristics in the U.S. population aged  $\geq 9$  y from NHANES, 2003-2006**

| Characteristic                          | N    | Value (%) |      |
|-----------------------------------------|------|-----------|------|
|                                         |      | %         | SE   |
| <b>Sex</b>                              |      |           |      |
| Male                                    | 6506 | 48.9      | 0.4  |
| Female                                  | 6719 | 51.1      | 0.4  |
| <b>Age category</b>                     |      |           |      |
| 9-13 years                              | 1734 | 7.0       | 0.27 |
| 14-18 years                             | 2424 | 8.0       | 0.31 |
| 19-50 years                             | 5180 | 53        | 1.0  |
| 51-70 years                             | 2347 | 23        | 0.86 |
| 71 years and over                       | 1540 | 9.2       | 0.58 |
| <b>Ethnicity</b>                        |      |           |      |
| Non-Hispanic White                      | 5647 | 70.6      | 2.3  |
| Non-Hispanic Black                      | 3432 | 11.8      | 1.4  |
| Mexican American                        | 3195 | 8.48      | 1.1  |
| Other Hispanic                          | 399  | 3.65      | 0.5  |
| Other race                              | 552  | 5.38      | 0.5  |
| <b>PIR</b>                              |      |           |      |
| Low PIR, $\leq 1.85$                    | 5804 | 31.0      | 1.4  |
| Medium PIR, $>1.85-\leq 3.5$            | 3224 | 27.7      | 1.0  |
| High PIR, $>3.5$                        | 3570 | 41.3      | 1.6  |
| <b>Education<sup>1</sup></b>            |      |           |      |
| Less than high school                   | 2433 | 17.7      | 0.9  |
| High school graduate                    | 2105 | 26.0      | 0.7  |
| Some college, or college graduate       | 4043 | 56.3      | 1.1  |
| <b>BMI<sup>2</sup></b>                  |      |           |      |
| Underweight                             | 280  | 3.03      | 0.21 |
| Normal weight                           | 2473 | 30.9      | 0.85 |
| Overweight                              | 2949 | 33.3      | 0.70 |
| Obese                                   | 2891 | 32.7      | 0.92 |
| <b>DS user</b>                          |      |           |      |
| No use                                  | 7281 | 44.3      | 0.87 |
| FSMV use                                | 4312 | 15.5      | 0.60 |
| Any other DS                            | 1615 | 40.2      | 0.65 |
| <b>Pregnancy status<sup>3</sup></b>     |      |           |      |
| Positive                                | 574  | 4.13      | 0.27 |
| Negative                                | 4520 | 95.9      | 0.27 |
| <b>Breastfeeding status<sup>4</sup></b> |      |           |      |
| Breastfeeding a child                   | 100  | 27.8      | 4.6  |
| Not breastfeeding                       | 269  | 72.1      | 4.6  |

BMI, Body Mass Index; NHANES, National Health and Nutrition Examination Survey; PIR, poverty income ratio; FSMV, full spectrum multivitamin-multimineral; DS, Dietary supplement.

<sup>1</sup>Education status is restricted to adults aged 20 y and older. <sup>2</sup>BMI categories are restricted to adults aged 20 y and older. <sup>3</sup>Percentages reflect proportion of women of childbearing potential, aged 9 to 59 y.

<sup>4</sup>Percentages reflect proportion of women 0 or 1 y postpartum at the time of the interview.

**Supplementary table S5: Biochemical markers of nutrient status in the U.S. population, aged  $\geq 9$  y from NHANES, 2003-2006**

| Parameter                                    | N     | 2003-2004       |             | 2005-2006       |             |
|----------------------------------------------|-------|-----------------|-------------|-----------------|-------------|
|                                              |       | Geometric mean  | 95% CI      | Geometric mean  | 95% CI      |
| Retinol, $\mu\text{g/dL}$                    | 13740 | 55.0            | 54.5-55.5   | 55.5            | 55.0-56.1   |
| Serum folate, $\text{ng/mL}$                 | 13891 | 11.8            | 11.6-12.0   | 12.1            | 11.9-12.3   |
| RBC folate, $\text{ng/mL}$                   | 13963 | 258             | 255-261     | 271             | 268-275     |
| Vitamin B6 (PLP), $\text{nmol/L}$            | 13831 | 42.6            | 41.3-43.9   | 50.3            | 49.0-51.7   |
| Serum vitamin B12, $\text{pg/mL}$            | 13815 | 472             | 465-478     | 485             | 477-492     |
| MMA, $\mu\text{mol/L}$                       | 6741  | 0.135           | 0.133-0.137 | -               |             |
| Vitamin C, $\text{mg/dL}$                    | 13778 | 0.779           | 0.760-0.799 | 0.819           | 0.801-0.837 |
| Vitamin D, $\text{ng/mL}$                    | 13969 | 22.0            | 21.8-22.3   | 21.5            | 21.3-21.8   |
| Vitamin E, $\mu\text{g/dL}$ alpha-tocopherol | 13740 | 1173            | 1157-1189   | 1101            | 1089-1114   |
|                                              |       | Arithmetic mean |             | Arithmetic mean |             |
| Haemoglobin, $\text{g/dL}$                   | 14053 | 14.4            | 14.4-14.5   | 14.4            | 14.3-14.5   |
| Mean cell volume, $\text{fL}$                | 14053 | 89.9            | 89.7-90.0   | 89.5            | 89.5-90.2   |

NHANES, National Health and Nutrition Examination Survey; RBC, red blood cell; PLP, pyridoxal-5'-phosphate; MMA, methylmalonic acid.

**Supplementary table S6: Risk of deficiency and length of time taking dietary supplements**

| Length of time using dietary supplement     | Less than 2 months |     | 2 months to 6 months |      | Greater than 6 months |     |
|---------------------------------------------|--------------------|-----|----------------------|------|-----------------------|-----|
| <i>N</i>                                    | 949                |     | 839                  |      | 5058                  |     |
| Dietary supplement users                    |                    |     |                      |      |                       |     |
|                                             | %                  | SE  | %                    | SE   | %                     | SE  |
| Not deficient                               | 67.1               | 1.9 | 71.1                 | 2.86 | 73.8                  | 1.7 |
| Deficient in 1 or more vitamins or minerals | 32.9               | 1.9 | 28.9                 | 2.86 | 26.3                  | 1.7 |
| FSMV users                                  |                    |     |                      |      |                       |     |
| Not deficient                               | 82.7               | 2.9 | 90.5                 | 2.4  | 86.4                  | 1.0 |
| Deficient in 1 or more vitamins or minerals | 17.3               | 2.9 | 9.54                 | 2.4  | 13.6                  | 1.0 |

FSMV, full spectrum multivitamin-multimineral.

**Supplementary table S7: Risk of deficiency and frequency taking dietary supplements over previous 30 days**

| Frequency taking dietary supplement in previous 30 days | Less than four times |     | Four to 15 times |     | 16 to 29 times |     | 30 times |      |
|---------------------------------------------------------|----------------------|-----|------------------|-----|----------------|-----|----------|------|
| <i>N</i>                                                | 1316                 |     | 1351             |     | 762            |     | 3296     |      |
| Dietary supplement users                                |                      |     |                  |     |                |     |          |      |
|                                                         | %                    | SE  | %                | SE  | %              | SE  | %        | SE   |
| Not deficient                                           | 68.1                 | 2.1 | 70.5             | 2.5 | 76.4           | 2.7 | 76.0     | 1.3  |
| Deficient in 1 or more vitamins or minerals             | 31.9                 | 2.1 | 29.5             | 2.5 | 23.6           | 2.7 | 24.0     | 1.3  |
| FSMV users                                              |                      |     |                  |     |                |     |          |      |
| Not deficient                                           | 83.1                 | 2.9 | 82.7             | 3.3 | 88.9           | 2.6 | 87.9     | 0.89 |
| Deficient in 1 or more vitamins or minerals             | 16.9                 | 2.9 | 17.3             | 3.3 | 11.1           | 2.6 | 12.1     | 0.89 |

FSMV, full spectrum multivitamin-multimineral.
